# Supplementary material for: Long-circulating nanoparticles as passive targeting nanocarriers for the treatment of thrombosis
Source: Royal Society of Chemistry journal article supplement (doi:10.1039/d4nr00252k), 2024-01-01
Supplement: d4nr00252k1.pdf [file d4nr00252k1.pdf]

Supplementary information for

**Long-circulating nanoparticles as the passive targeting nanocarriers  
for the treatment of thrombus**

Junyao Li,<sup>a,b</sup> Keqiang Lu,<sup>a</sup> Shaokai Sun,<sup>a</sup> Juanjuan Peng,<sup>a</sup> and Lingzhi Zhao<sup>a</sup>

<sup>a</sup> State Key Laboratory of Natural Medicine, The School of Basic Medical Sciences  
and Clinical Pharmacy, China Pharmaceutical University, Nanjing, Jiangsu, 211198,  
China

<sup>b</sup>School of Pharmaceutical Sciences, Tsinghua University, Beijing 100084, China.

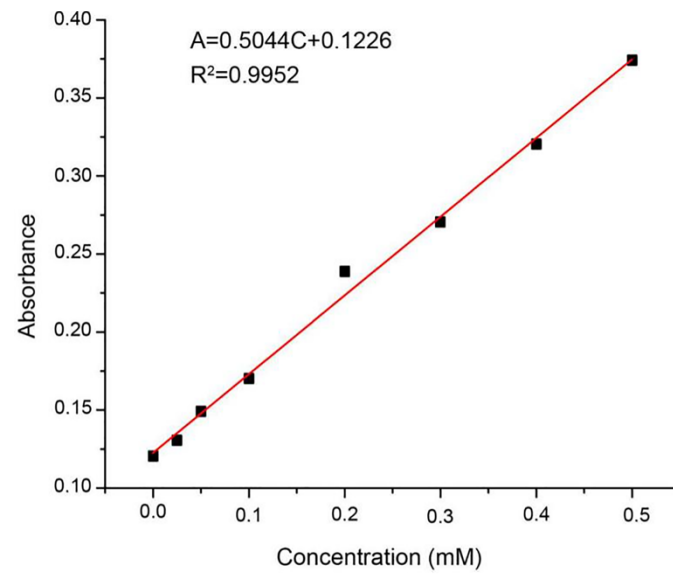

**Figure S1.** The conjugation cRGD concentration in the SCLMs was measured by the BCA protein assay. The purified cRGD standard curve determined from the corresponding absorbance versus cRGD concentration.

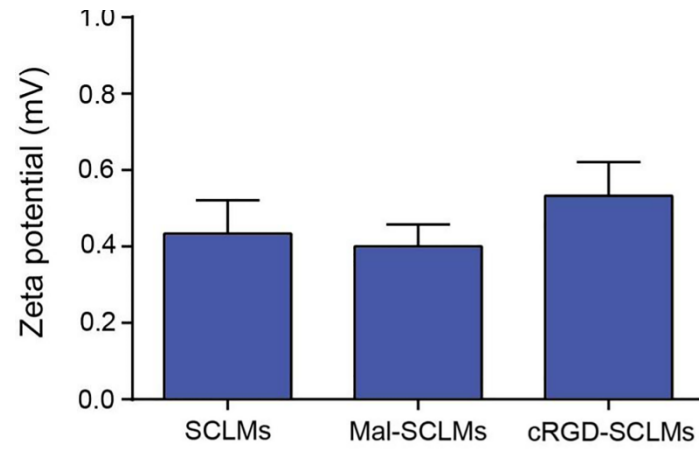

**Figure S2.** Zeta-potential values of the SCLMs, Mal-SCLMs and cRGD-SCLMs. Error bars indicate SD (n = 3).

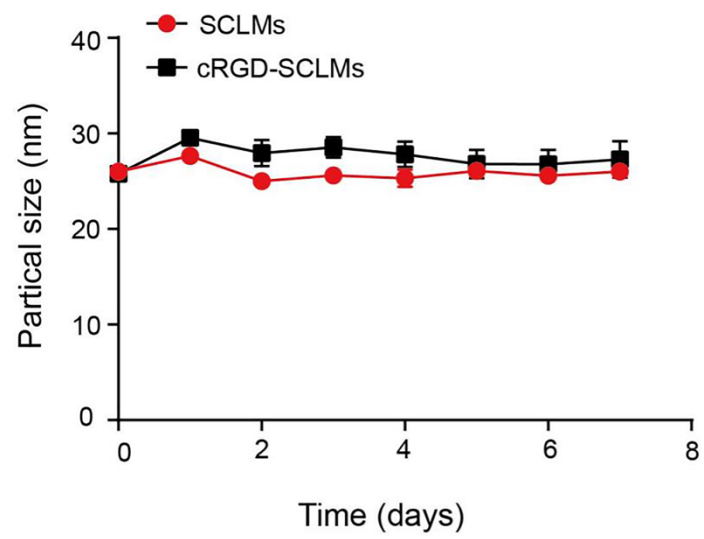

**Figure S3.** The in vitro stability of SCLMs and cRGD-SCLMs in the PBS solution with 10% fetal bovine serum (FBS) during 7 days determined by DLS method.

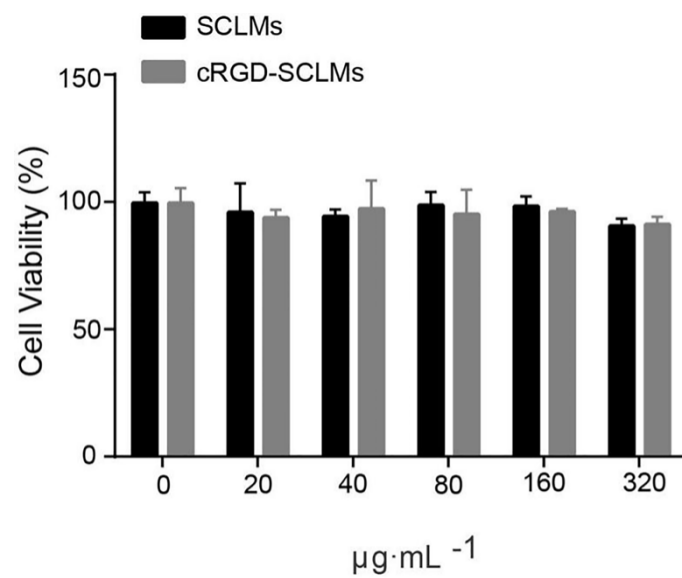

**Figure S4.** Cell viabilities of HUVEC after co-incubation with different concentrations of SCLMs or cRGD-SCLMs.

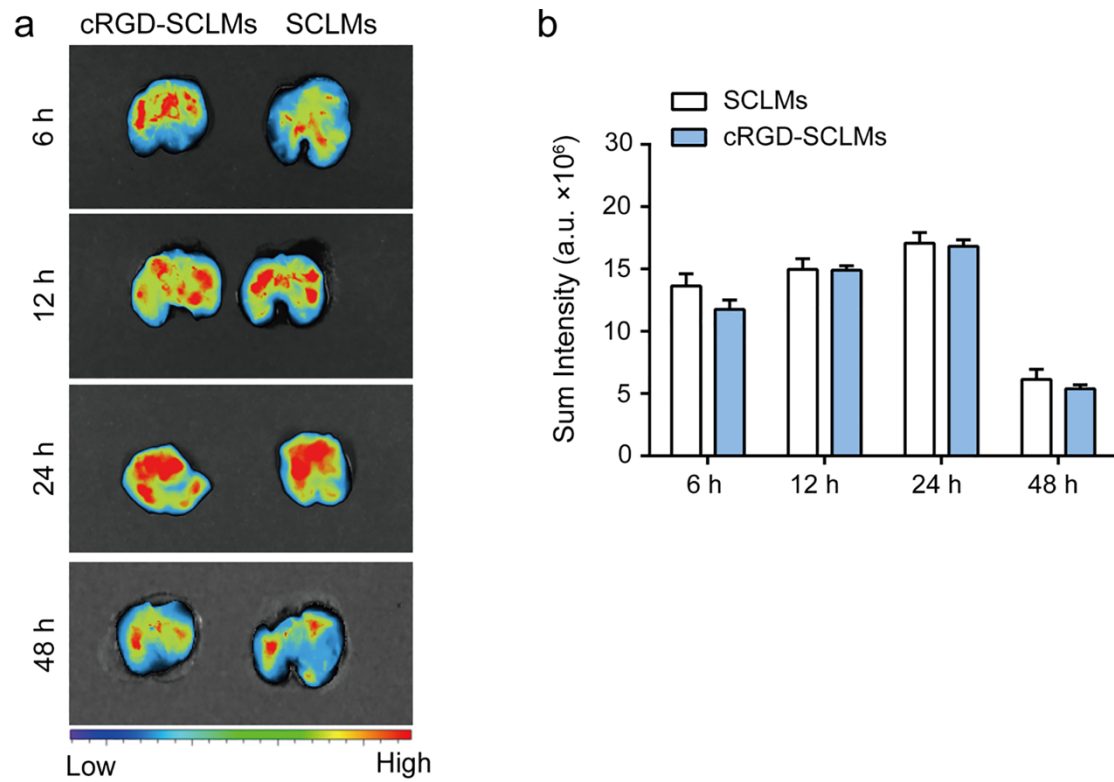

**Figure S5.** (a) Representative ex vivo imaging of Cy5.5-labeled cRGD-SCLMs/SCLMs in the lung of PE mice 6 h, 12 h and 24 h after injection with the formulation. (b) Quantification of the Cy5.5 fluorescence in the lung. The data presented are means  $\pm$  SEM (n = 4).

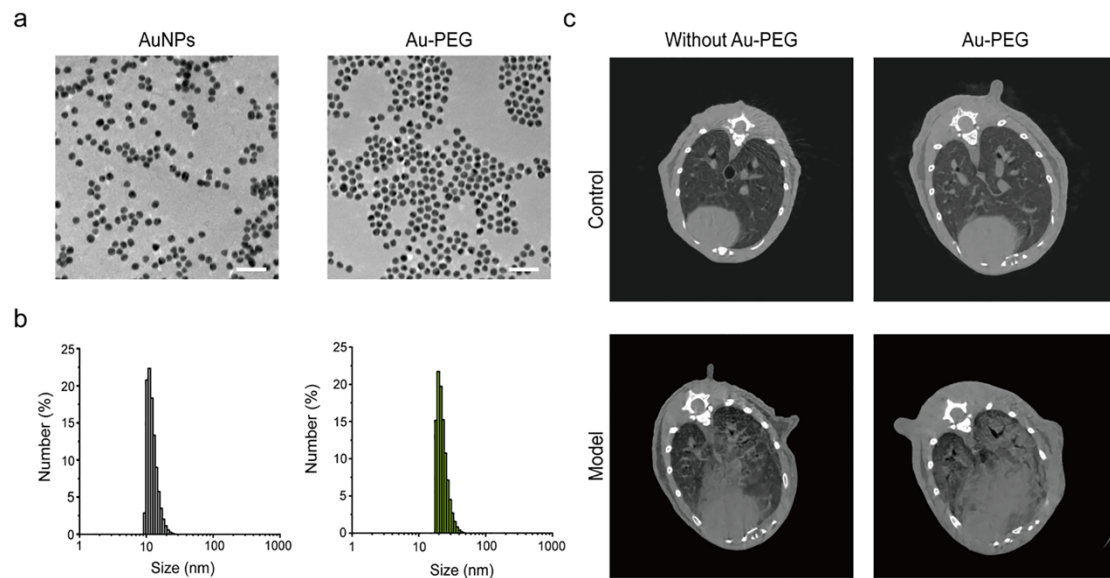

**Figure S6. Characterizations of AuNPs and PEG-AuNPs, and the in vivo micro-CT images of Au-PEG.** (a) TEM images of AuNPs and PEG-AuNPs. Scale bar, 50 nm. (b) Size distribution of AuNPs and PEG-AuNPs measured by DLS. (c) Representative axial sections micro-CT images of mice 2 h after the Au-PEG was injected into the mice.

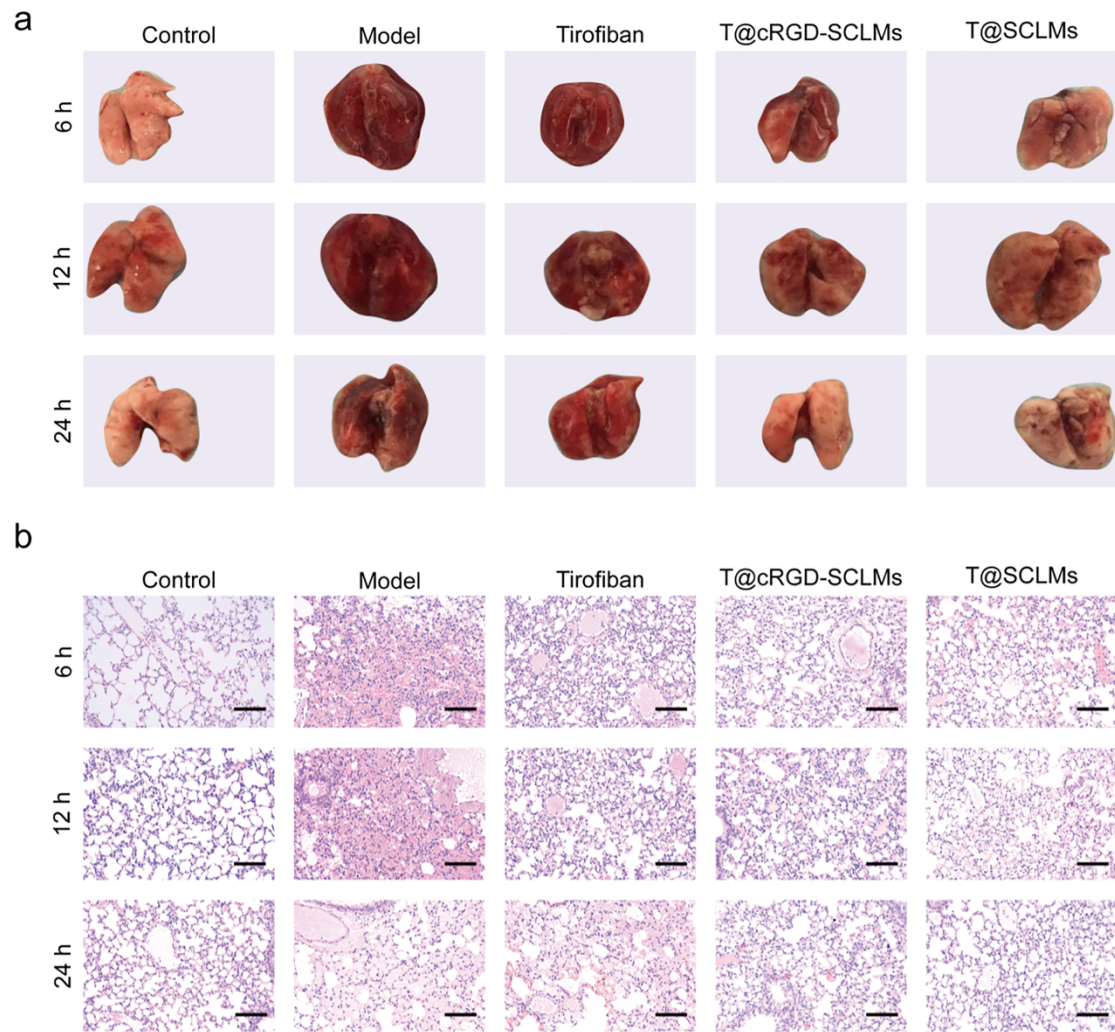

**Figure S7.** (a) The morphology of the lung of the healthy mice and PE mice received different kinds of treatment. (b) H&E staining of the lung sections from the healthy mice and PE mice. Scale bar: 100  $\mu$ m.



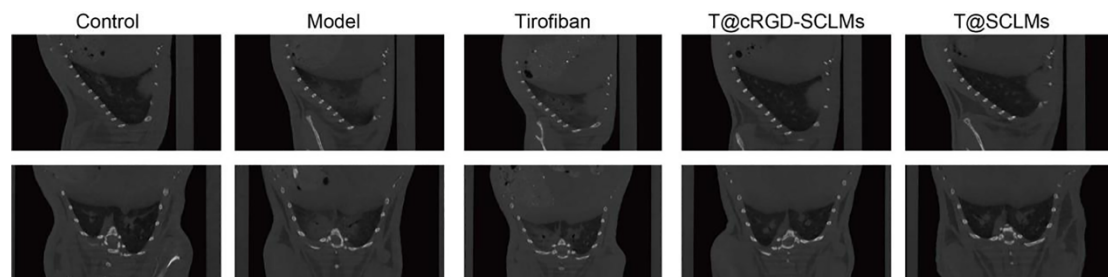

**Figure S8.** Representative sagittal sections micro-CT images of mice 24 h after administered the indicated treatments.

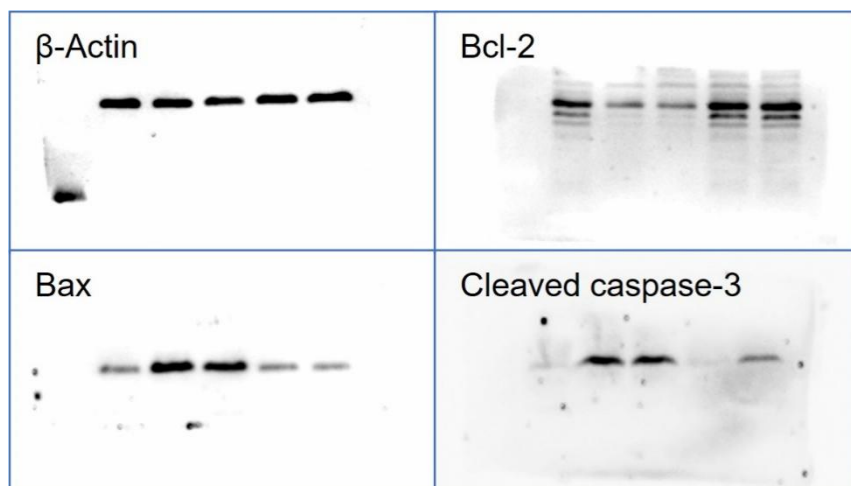

**Figure S9.** The raw data for the western blots of Bcl-2, Bax and cleaved caspase-3.

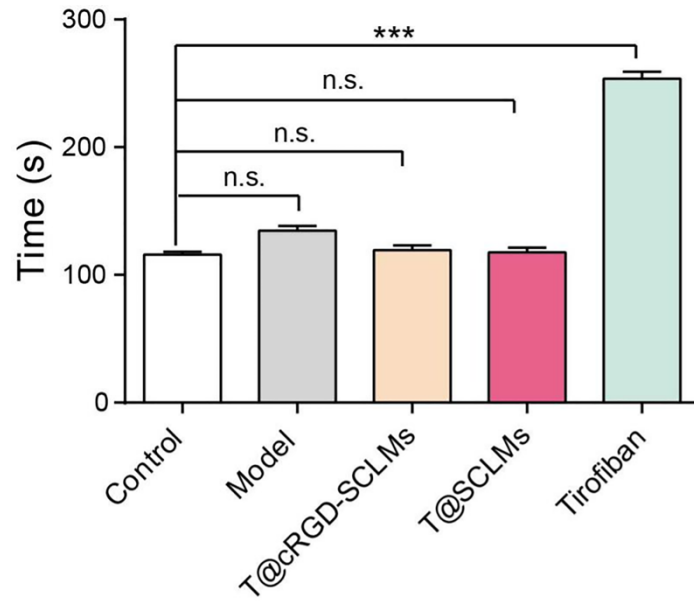

**Figure S10. Bleeding time assay.** At 24 h post-injection of the indicated formulation, a small cut was made on the tail mice, and the time was recorded until the bleeding stopped. Data are shown as mean  $\pm$  s.d. ( $n = 3$ ).  $P > 0.05$  (no significance, n.s.), \*\*\*  $P < 0.001$ . Statistical significance was calculated via one-way ANOVA.

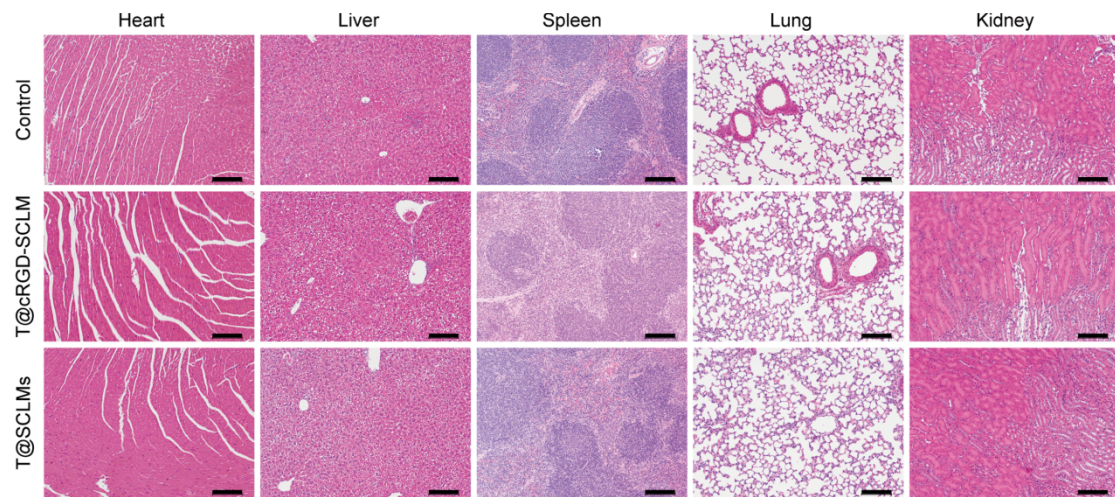

**Figure S11.** H&E staining of the major organs of healthy mice 24 h after the injection of T@cRGD-SCLMs or T@SCLMs. Scale bar: 100  $\mu$ m.

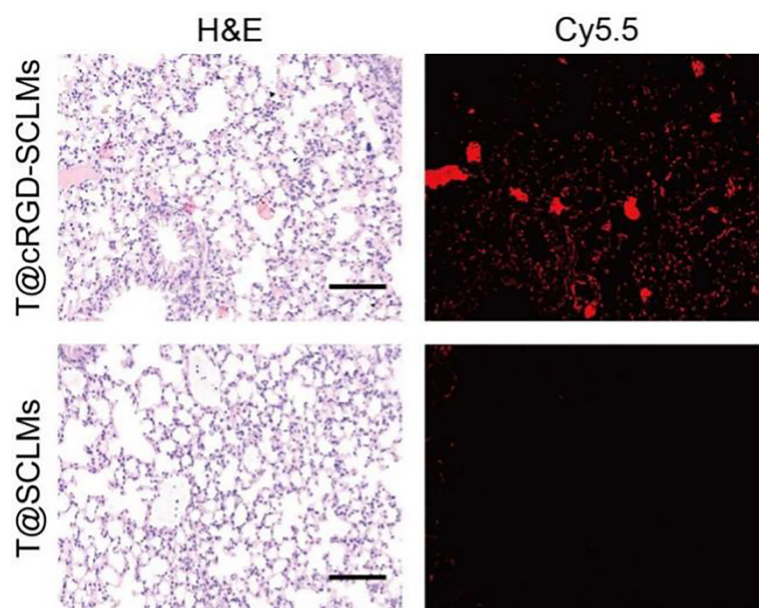

**Figure S12.** H&E staining of lung sections from PE mice 24 h after the injection of Cy5.5-labeled cRGD-SCLMs or SCLMs. Scale bar: 100  $\mu$ m.
